# Supplementary material for: Peripherally derived macrophages can engraft the brain independent of irradiation and maintain an identity distinct from microglia
Source: PubMed Central journal article supplement — J Exp Med. 2018 Jun 4;215(6):1627–47. doi: 10.1084/jem.20180247 (PMC5987928; doi:10.1084/jem.20180247), 2018-06-04
Supplement: JEM_20180247_sm.pdf [file JEM_20180247_sm.pdf]

Supplemental material

Cronk et al., <https://doi.org/10.1084/jem.20180247>

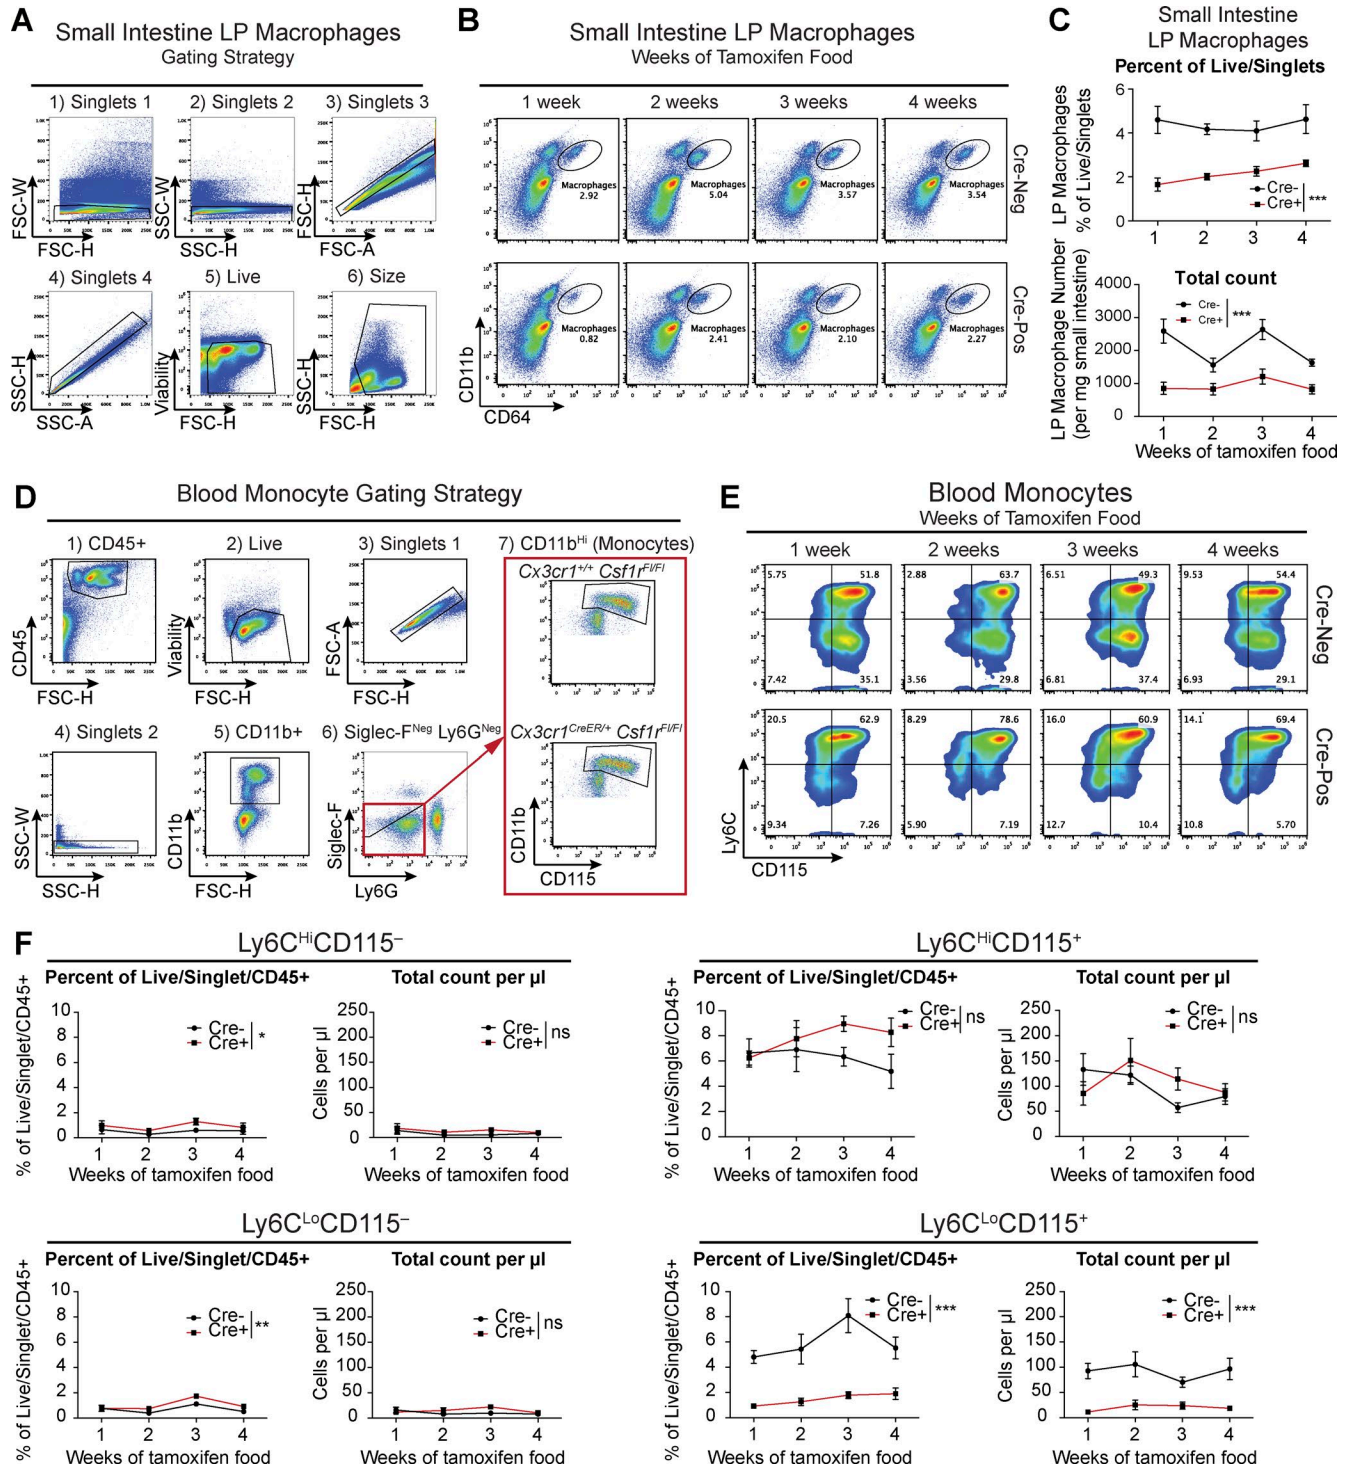

Figure S1. **Cx3cr1**-expressing resident myeloid cells in the periphery are depleted in **Cx3cr1<sup>CreER/+</sup>;;Csf1<sup>lox/lox</sup>** mice fed tamoxifen. **(A)** Initial gating strategy for live cells in the lamina propria (LP). **(B)** Representative flow cytometry plots of lamina propria macrophages, pregated as depicted in A. **(C)** Counts of lamina propria macrophages ( $n = 5-6$  mice per group; two-way ANOVA; \*\*\*,  $P < 0.001$ ; pooled from two independent experiments). **(D)** Initial blood monocyte gating strategy. **(E)** Representative flow cytometry plots of blood monocytes, pregated as depicted in D. **(F)** Counts of blood monocyte populations ( $n = 5-6$  mice per group; two-way ANOVA, \*\*\*,  $P < 0.001$ ; \*\*,  $P < 0.01$ ; \*,  $P < 0.05$ ; pooled from two independent experiments). Error bars represent  $\pm$ SEM.

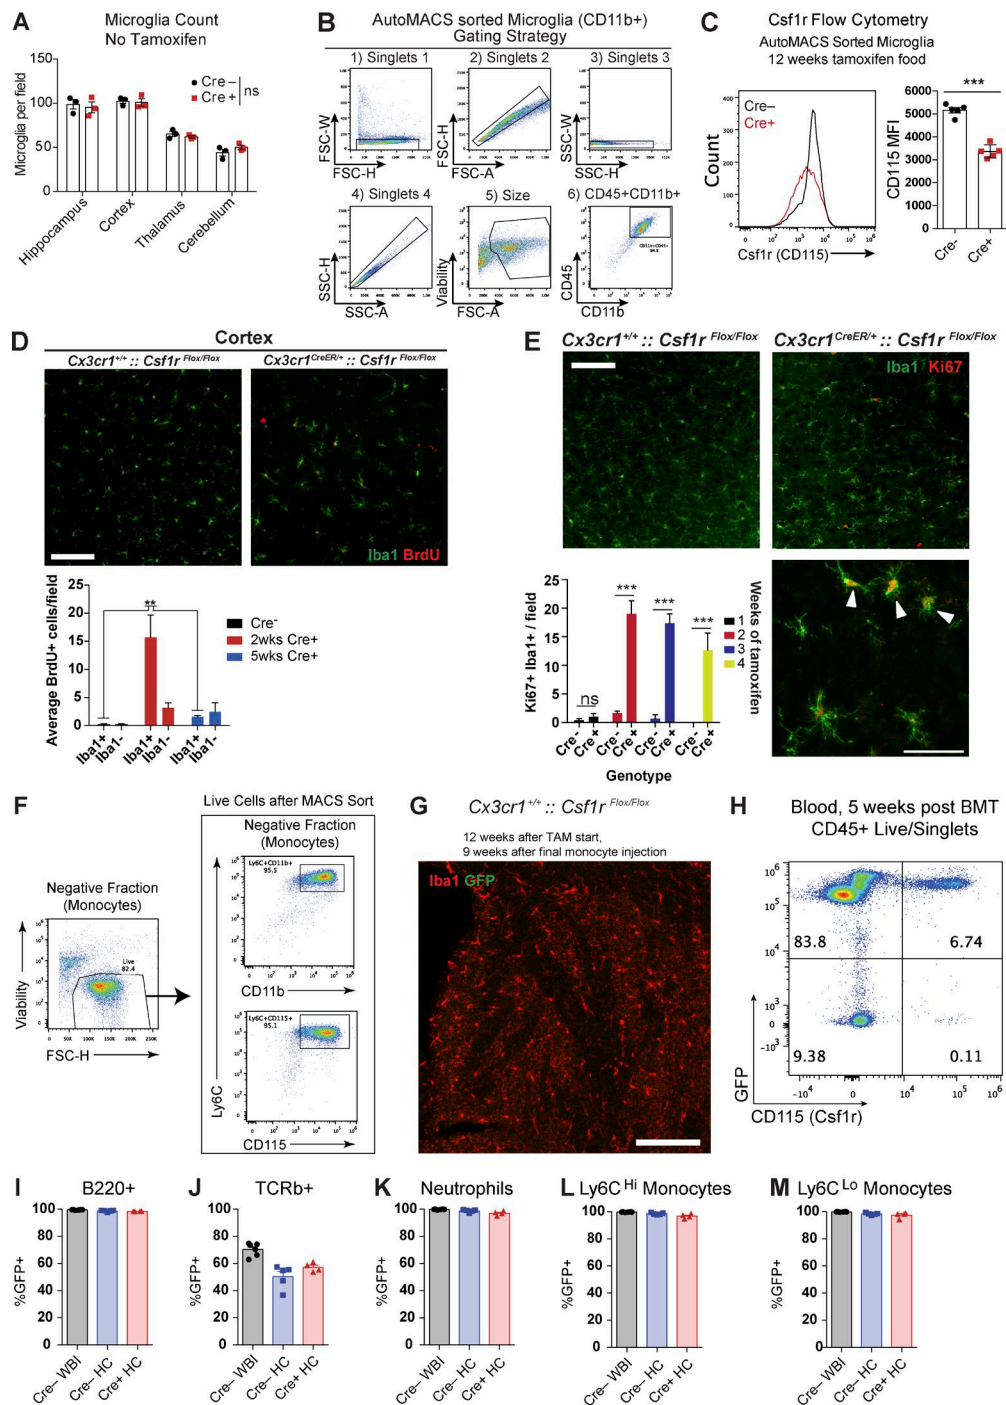

Figure S2. **Supplemental data supporting Fig. 1.** (A) Counts per field of microglia in *Cx3cr1<sup>CreER/+</sup>* or *Cx3cr1<sup>+/+</sup>::Csf1r<sup>Flox/Flox</sup>* mice not treated with tamoxifen ( $n = 3$  mice/group, two-way ANOVA with Tukey's multiple comparisons post-test, not significant [ns]). (B) Gating strategy for MACS-sorted microglia. Microglia were gated on singlets/live/size/CD45<sup>+</sup>/CD11b<sup>+</sup> events. Cells were ~95% microglia. (C) Histogram and median fluorescence intensity (MFI) of CD115/Csf1r expressed on sorted microglia ( $n = 5$  per group; two-sided Student's *t* test; \*\*\*,  $P < 0.001$ ; representative of two independent experiments). (D) Representative images of *Cx3cr1<sup>CreER/+</sup>::Csf1r<sup>Flox/Flox</sup>* mice and Cre-negative controls after 2 wk of tamoxifen treatment. Quantification of cells positive for BrdU and Iba1 ( $n = 2$ –3 mice per group, two-way ANOVA with Tukey's multiple comparisons test, \*\*,  $P < 0.01$ ; experiment performed once). Bar, 100  $\mu$ m. (E) Representative images of *Cx3cr1<sup>CreER/+</sup>::Csf1r<sup>Flox/Flox</sup>* mice and Cre-negative controls after 2 wk of tamoxifen treatment. Arrowheads point to Ki67<sup>+</sup> microglia. Microglia are green (Iba1<sup>+</sup>) with red (Ki67<sup>+</sup>) nuclei. Bar, 100  $\mu$ m. Quantification of cells positive for both Ki67 and Iba1 ( $n = 3$ –4 mice per group, two-way ANOVA with Tukey's multiple comparisons test; \*\*\*,  $P < 0.001$ ; experiment performed once). (F) Representative flow cytometry plots of MACS-sorted monocytes before adoptive transfer demonstrating ~95% pure CD45<sup>+</sup>Ly6c<sup>hi</sup>CD11b<sup>+</sup>CD115<sup>+</sup> monocytes among live cells. (G) Representative image of *Cx3cr1<sup>+/+</sup>::Csf1r<sup>Flox/Flox</sup>* cortex in mice injected with sorted monocytes 9 wk after the final monocyte injection (12 wk after tamoxifen initiation) per the experimental design outlined in Fig. 1 E, demonstrating no GFP<sup>+</sup> peripheral cell engraftment. Bar, 200  $\mu$ m. (H) Representative flow cytometry plot from blood of mice after BMT demonstrating repopulation with UBC-GFP<sup>+</sup> bone marrow cells. (I–M) Percentage of B cells (I), T cells (J), neutrophils (K), Ly6c<sup>hi</sup> monocytes (L), and Ly6c<sup>lo</sup> monocytes (M;  $n = 4$ –6 mice per group; experiment performed once). HC, head covered; WB/I, whole-body irradiation. Error bars represent  $\pm$ SEM.



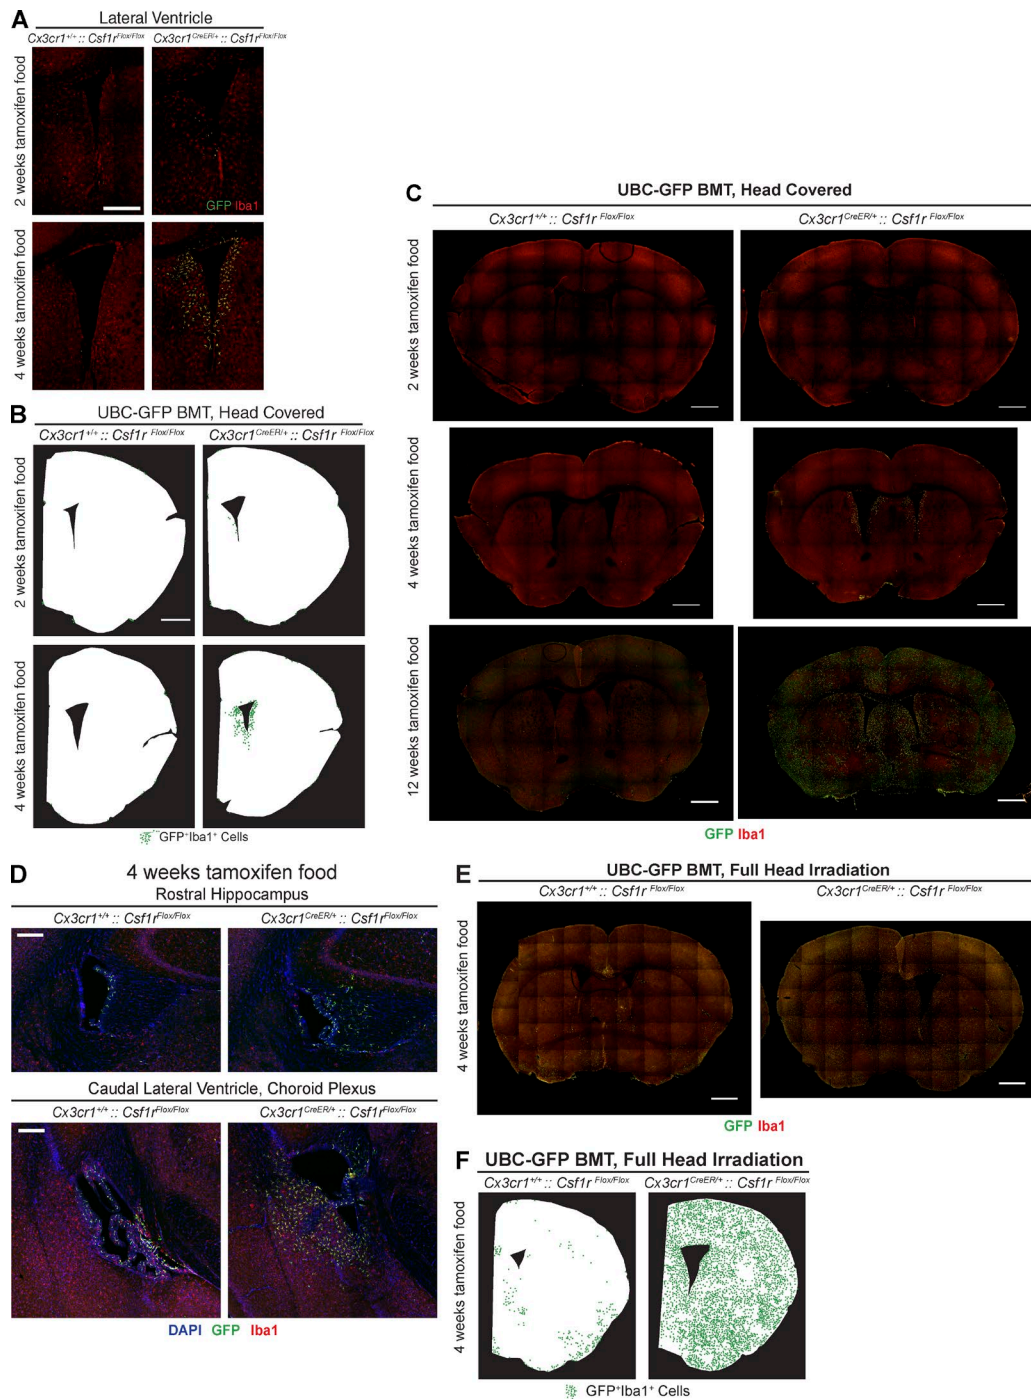

Figure S3. **Supplemental images demonstrating engraftment of beMφs in *Cx3cr1<sup>CreER/+</sup>;;Csf1r<sup>fl/fl</sup>* mice with or without head shielding and BMT.** (A–D) *Cx3cr1<sup>+/+</sup>;;Csf1r<sup>fl/fl</sup>* and *Cx3cr1<sup>CreER/+</sup>;;Csf1r<sup>fl/fl</sup>* mice were  $\gamma$  irradiated with head covering, repopulated with UBC-GFP bone marrow cells, and allowed to repopulate their immune systems for 5 wk. Mice were fed tamoxifen chow and euthanized after 2, 4, or 12 wk of tamoxifen chow. (A) Representative images of beMφs after 2 or 4 wk of tamoxifen chow. All macrophages/microglia are stained with Iba1, whereas beMφs are also GFP<sup>+</sup>. Images are representative of  $n = 3–6$  mice per group (pooled from two independent experiments). Bar, 500  $\mu\text{m}$ . (B) Illustrations of beMφ locations after 2 or 4 wk of tamoxifen chow. Silhouettes of brain sections were generated on actual brain slices, and beMφ locations were marked with a green dot. Each dot represents a single GFP<sup>+</sup>Iba1<sup>+</sup> beMφ. Images are representative of  $n = 3–6$  mice per group, pooled from two independent experiments. Bar, 1,000  $\mu\text{m}$ . (C) Representative images of whole brain slices stained for Iba1 and GFP after 2, 4, or 12 wk of tamoxifen chow. These images were used to generate illustrations in Fig. 1 Giii and Fig. S3 B. Bars, 1,000  $\mu\text{m}$ . (D) Representative images of periventricular regions from *Cx3cr1<sup>+/+</sup>;;Csf1r<sup>fl/fl</sup>* and *Cx3cr1<sup>CreER/+</sup>;;Csf1r<sup>fl/fl</sup>* mice  $\gamma$ -irradiated with head covering and repopulated with UBC-GFP bone marrow cells 4 wk after initiation of tamoxifen chow. Images are representative of six mice per group, pooled from two independent experiments. Bars, 250  $\mu\text{m}$ . (E) Representative images from *Cx3cr1<sup>+/+</sup>;;Csf1r<sup>fl/fl</sup>* and *Cx3cr1<sup>CreER/+</sup>;;Csf1r<sup>fl/fl</sup>* mice given whole-body  $\gamma$ -irradiation, repopulated with UBC-GFP bone marrow cells, and fed tamoxifen. 4 wk after tamoxifen initiation, brains were stained for GFP and Iba1. Images are representative of two mice per group (experiment performed once). Bars, 1,000  $\mu\text{m}$ . (F) Representative placement of engrafting macrophages. Each green dot represents one GFP<sup>+</sup>Iba1<sup>+</sup> cell.

Table S1 is provided as an Excel file. This table contains the differential gene expression analysis of the RNA-sequencing data generated from the three experimental models utilized in this study.

Table S2 is provided as an Excel file and shows comparatively enriched functions between beMφs and microglia.
